# Supplementary material for: The multikinase inhibitor RXDX-105 is effective against neuroblastoma in vitro and in vivo
Source: PubMed Central journal article supplement (PMC6824878; doi:10.18632/oncotarget.27259), 2019-10-29
Supplement: oncotarget-10-6323-s001.pdf [file oncotarget-10-6323-s001.pdf]

## The multikinase inhibitor RXDX-105 is effective against neuroblastoma *in vitro* and *in vivo*

### SUPPLEMENTARY MATERIALS

**Supplementary Table 1: Biological and cytogenetic features of neuroblastoma**

| Cell line  | MYCN Status   | 1p36 Del                                            | 3p26 del        | 11q23 del          | 17q21-qter unbal gain | ALK mutation  | P53 mutation |
|------------|---------------|-----------------------------------------------------|-----------------|--------------------|-----------------------|---------------|--------------|
| CHP-134    | Amplified     | LOH p32.3-pter; Gain p34.3-p36.22; Loss p36.22-pter | Gain/AI p26.3   | None               | Gain q12-qter         | WT            | WT           |
| IMR-32     | Amplified     | Loss p32.3-pter                                     | Loss p12.3      | cnLOH q23.1        | Gain q21.2-qter       | WT            | WT           |
| KELLY      | Amplified     | LOH p21.3-pter; Loss p36.32; Gain p36.33            | Loss p26.2      | Loss q23.3-qter    | Gain q21.2-qter       | F1174L        | P177T        |
| LA-N-5     | Amplified     | Loss p33-pter                                       | None            | None               | Gain q21.2-qter       | R1275Q        | WT           |
| SJ-NB-10   | Amplified     | Loss p32.2-pter                                     | Gain p24.1-pter | cnLOH q23.1        | Gain q22-qter         | WT; amplified | WT           |
| NGP        | Amplified     | cnLOH p32.3-pter                                    | Gain p25.3-pter | Loss q22.1-qter    | Gain q21.1-qter       | WT            | A159D, C141W |
| SK-N-AS    | Non-amplified | Loss p36.22-36.32                                   | Loss p14.2-pter | q13.4-qter         | Gain q21.31-qter      | WT            | H168R        |
| SK-N-BE(2) | Amplified     | cnLOH p21.3-pter                                    | Loss p14.2-pter | Gain/AI q13.1-qter | Gain q12-qter         | WT            | C135F        |
| SK-N-SH    | Non-amplified | None                                                | None            | None               | Gain q21.31-qter      | F1174L        | WT           |

Adapted from Harenza *et al.* [25].

**Supplementary Table 2: IC50 values for inhibition of cell proliferation**

| Cell line  | IC 50 [μM] |
|------------|------------|
| Kelly      | 3.5        |
| IMR-32     | 4.3        |
| SK-N-AS    | 5.6        |
| SK-N-BE(2) | 7.8        |
| LA-N-5     | 9.9        |
| SK-N-SH    | 10.4       |
| LA-155-N   | 12.1       |
| LA-N-1     | 12.4       |
| CHP-134    | 15.1       |
| SJ-NB-10   | 15.4       |
| NGP        | 15.9       |

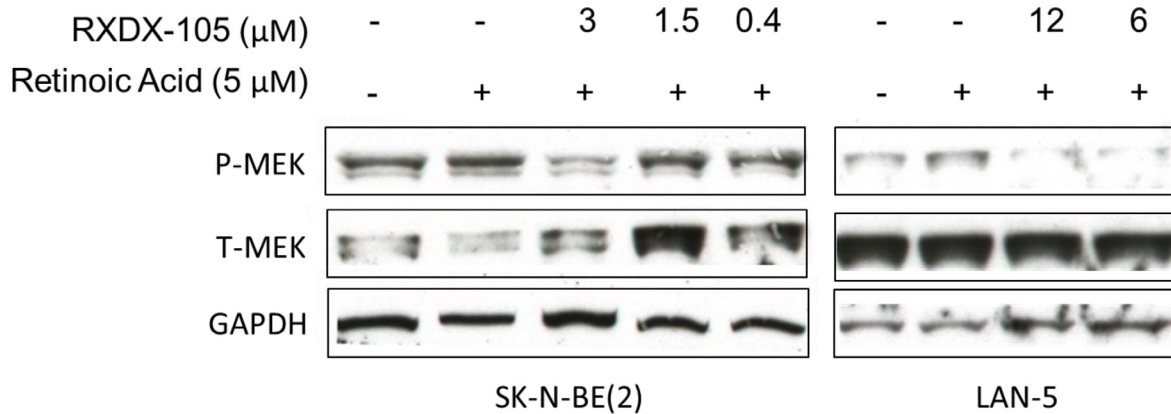

**Supplementary Figure 1: RXDX-105 inhibits target kinases and intracellular signaling pathways.** Neuroblastoma cell lines were treated with either vehicle or decreasing doses of RXDX-105 for 24 hours in combination with 5  $\mu\text{M}$  13-*cis*-retinoic acid. Cells were lysed and Western blots were performed to assess MEK expression and phosphorylation. GAPDH expression is shown as a loading control.

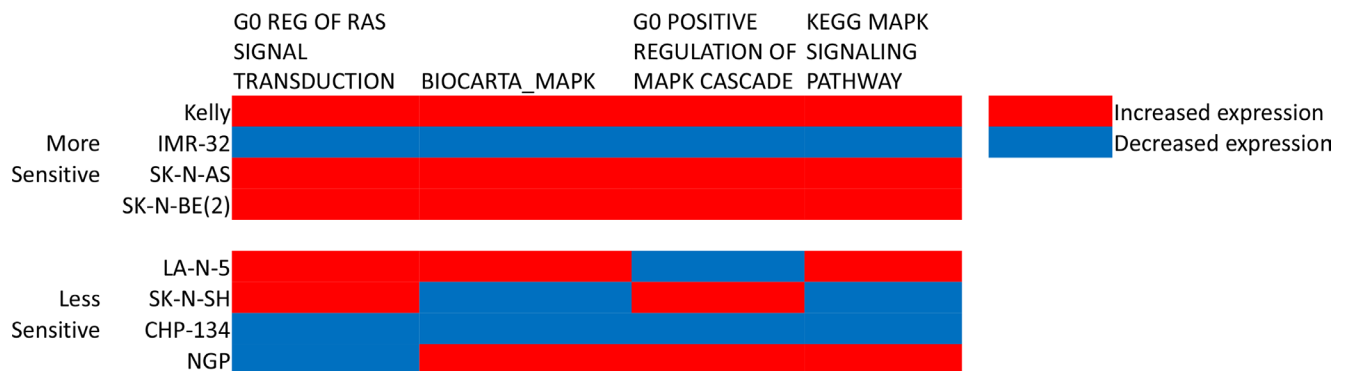

**Supplementary Figure 2: Sensitivity to RXDX-105 is related to RAS-MAPK gene expression.** Neuroblastoma cell line gene expression from [25] was assessed to evaluate for differences in gene pathway expression using pathways from the Molecular Signatures Database [36] underlying relative cell line sensitivities to RXDX-105. Cell lines with IC50 values less than 8  $\mu\text{M}$  were considered more sensitive, while cell lines with IC50 values above 8  $\mu\text{M}$  were considered less sensitive. Increased pathway gene expression is shown in red, while decreased pathway gene expression is shown in blue.

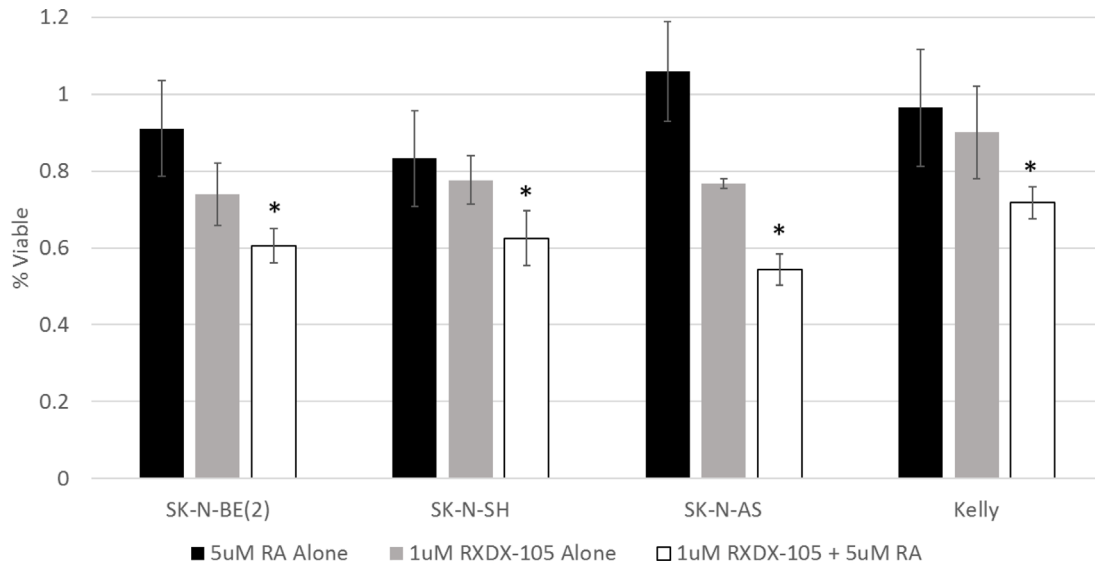

**Supplementary Figure 3: RXDX-105 efficacy is enhanced when combined with 13-*cis*-retinoic acid.** A panel of neuroblastoma cell lines were treated with 1  $\mu$ M RXDX-105 alone or in combination with 5  $\mu$ M 13-*cis*-retinoic acid for 72 hours and cell viability was assessed with an alamarBlue™ assay. Cell viability with each condition is shown.

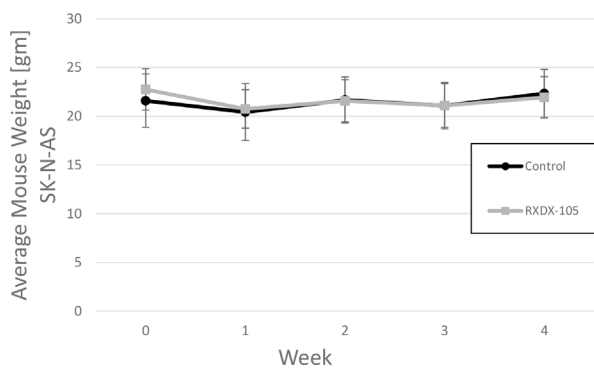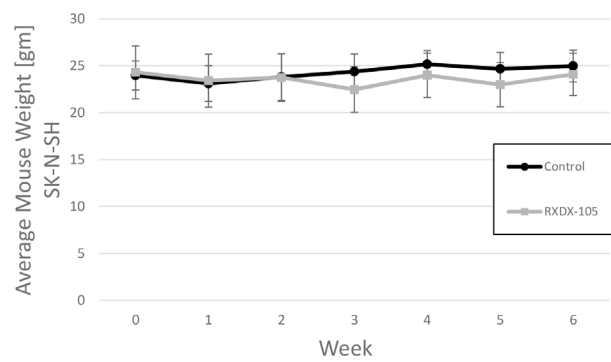

**Supplementary Figure 4: Mouse weight during RXDX-105 treatment.** Mice being treated with RXDX-105 or vehicle control were weighed weekly during treatment and weights were plotted on graphs.

Control

RXDX-105

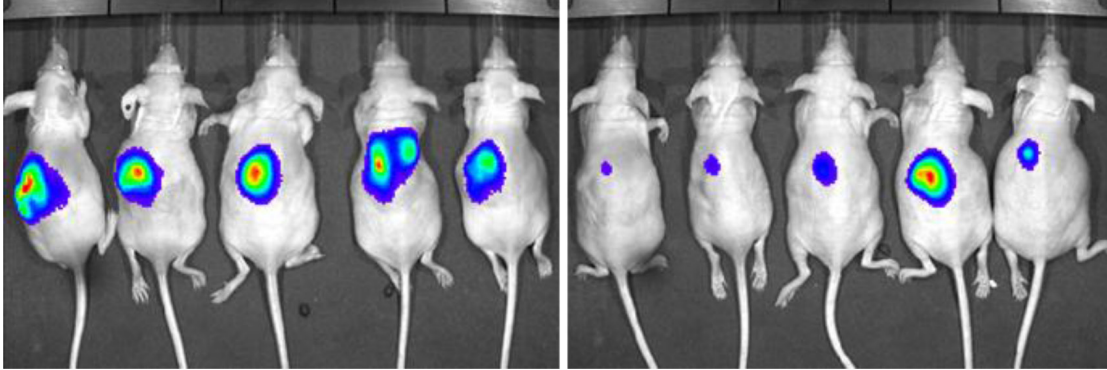

**Supplemental Figure 5: RXDX-105 inhibits tumor xenograft growth.** Bioluminescent images of orthotopic neuroblastoma xenograft tumors in mice treated for six weeks with vehicle alone (left) or with RXDX-105 (right).
